# Supplementary material
Source: PubMed Central journal article supplement (PMC7817201)
Supplement: pnas.2012482118.sapp.pdf [file pnas.2012482118.sapp.pdf]

# PNAS

[www.pnas.org](http://www.pnas.org)

Supplementary Information for

**Primary cilia safeguard cortical neurons in neonatal mouse forebrain from environmental stress-induced dendritic degeneration**

Seiji Ishii, Toru Sasaki, Shahid Mohammad, Hye Hwang, Edwin Tomy, Fahad Soma, Nobuyuki Ishibashi, Hideyuki Okano, Pasko Rakic, Kazue Hashimoto-Torii, Masaaki Torii

Pasko Rakic

E-mail: [pasko.rakic@yale.edu](mailto:pasko.rakic@yale.edu)

Kazue Hashimoto-Torii

E-mail: [khtorii@childrensnational.org](mailto:khtorii@childrensnational.org)

Masaaki Torii

E-mail: [mtorii@childrensnational.org](mailto:mtorii@childrensnational.org)

**This PDF file includes:**

Figures S1 to S4  
Tables S1

Figure S1

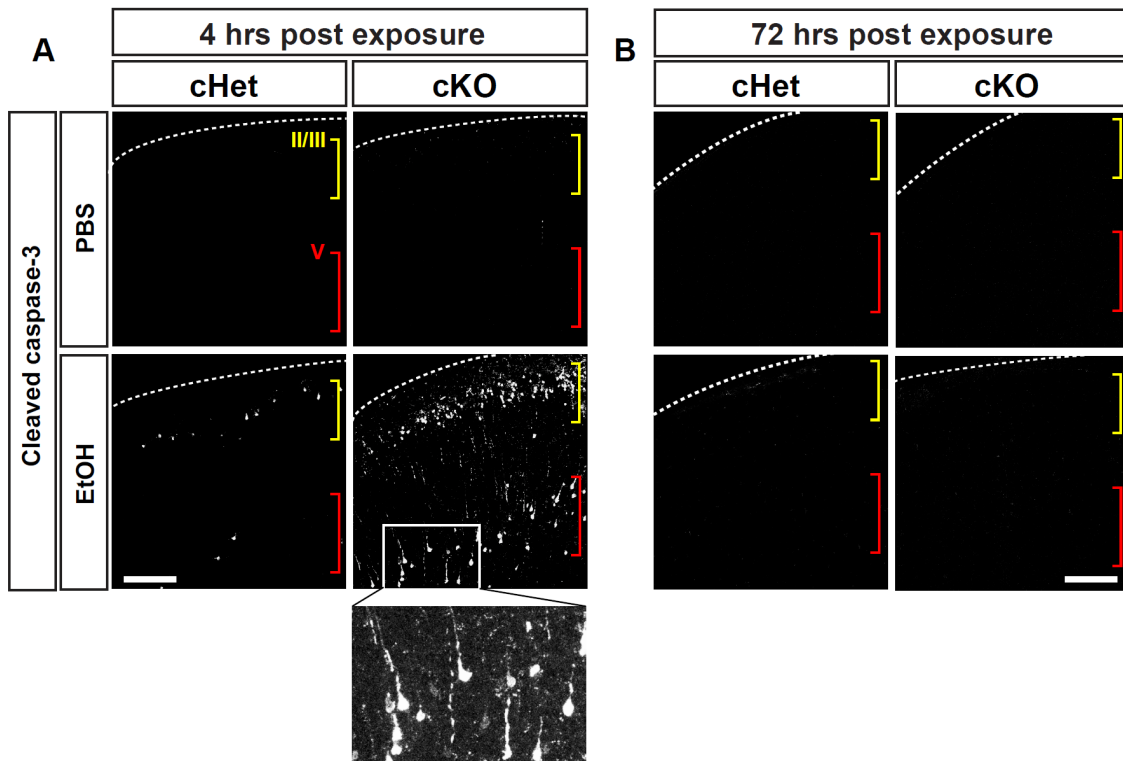

**Fig. S1. Caspase-3 activation 4 and 72 hours post exposure to EtOH**

(A, B) Immunohistochemistry for cleaved Caspase-3 in M1 for the indicated conditions 4 (A) and 72 (B) hours post exposure. Moderate and highly augmented levels of Caspase-3 activation were observed in EtOH-exposed cHet and cKO mice, respectively, 4 hours after exposure. Caspase-3 activation diminished by 72 hours. The boxed area in A is magnified to better visualize Caspase-3 activation in soma and dendrites. Yellow and red brackets indicate layers II/III and V, respectively. Bar = 200  $\mu$ m.

Figure S2

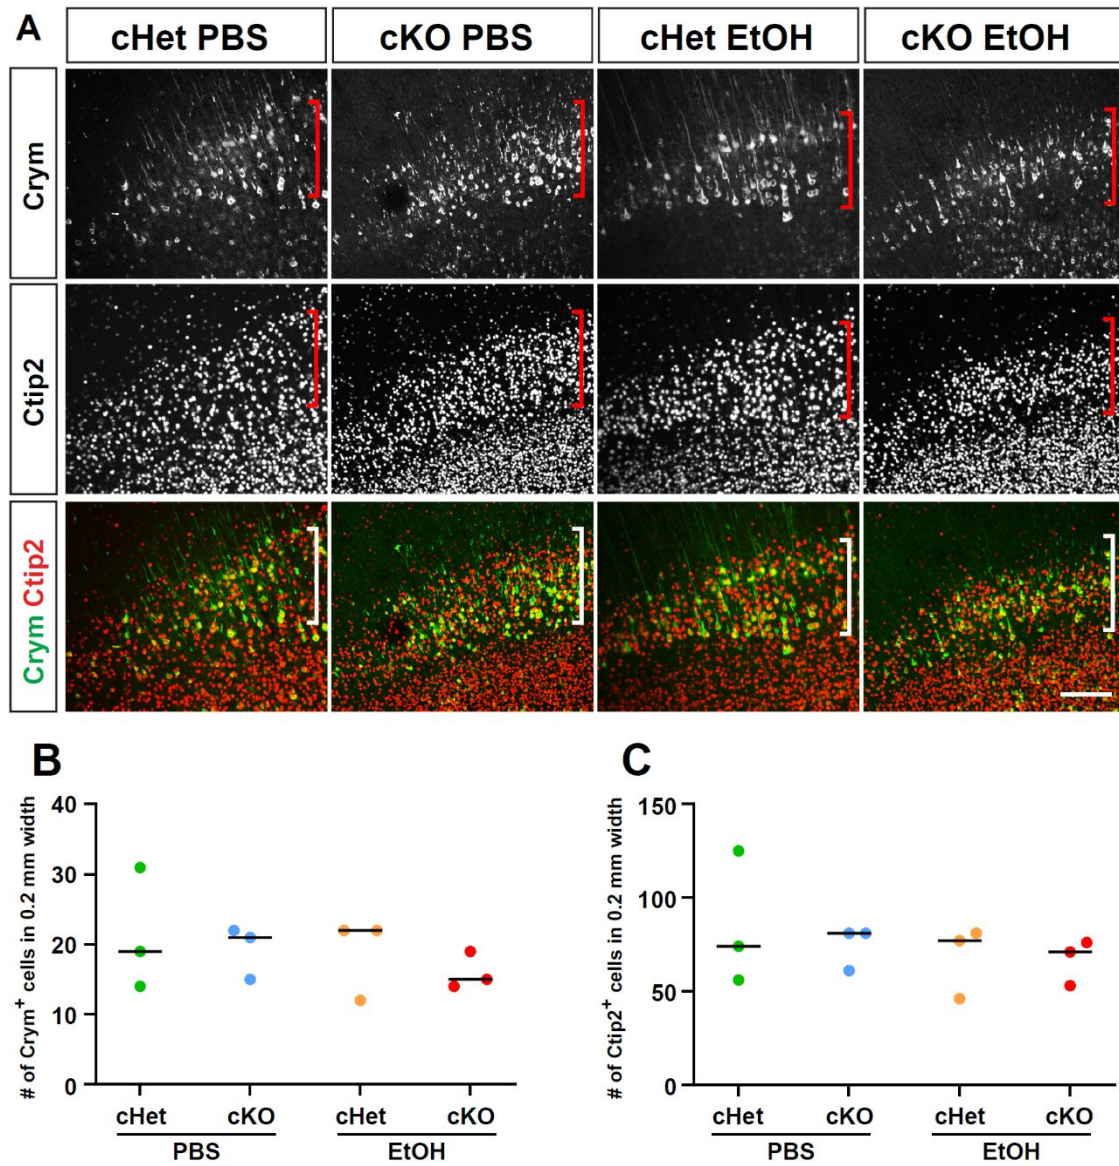

**Fig. S2. No significant loss of Crym-positive or Ctip2-positive cortical neurons in layer V by EtOH exposure and/or loss of cilia**

(A) Immunohistochemistry for Crym (green or white) and Ctip2 (red or white) at P21 for the indicated conditions. Brackets indicate layer V. Bar = 200  $\mu$ m. (B, C) Quantification of Crym- (B) and Ctip2-positive neurons (C) in layer V in M1. The line indicates the mean.

Figure S3

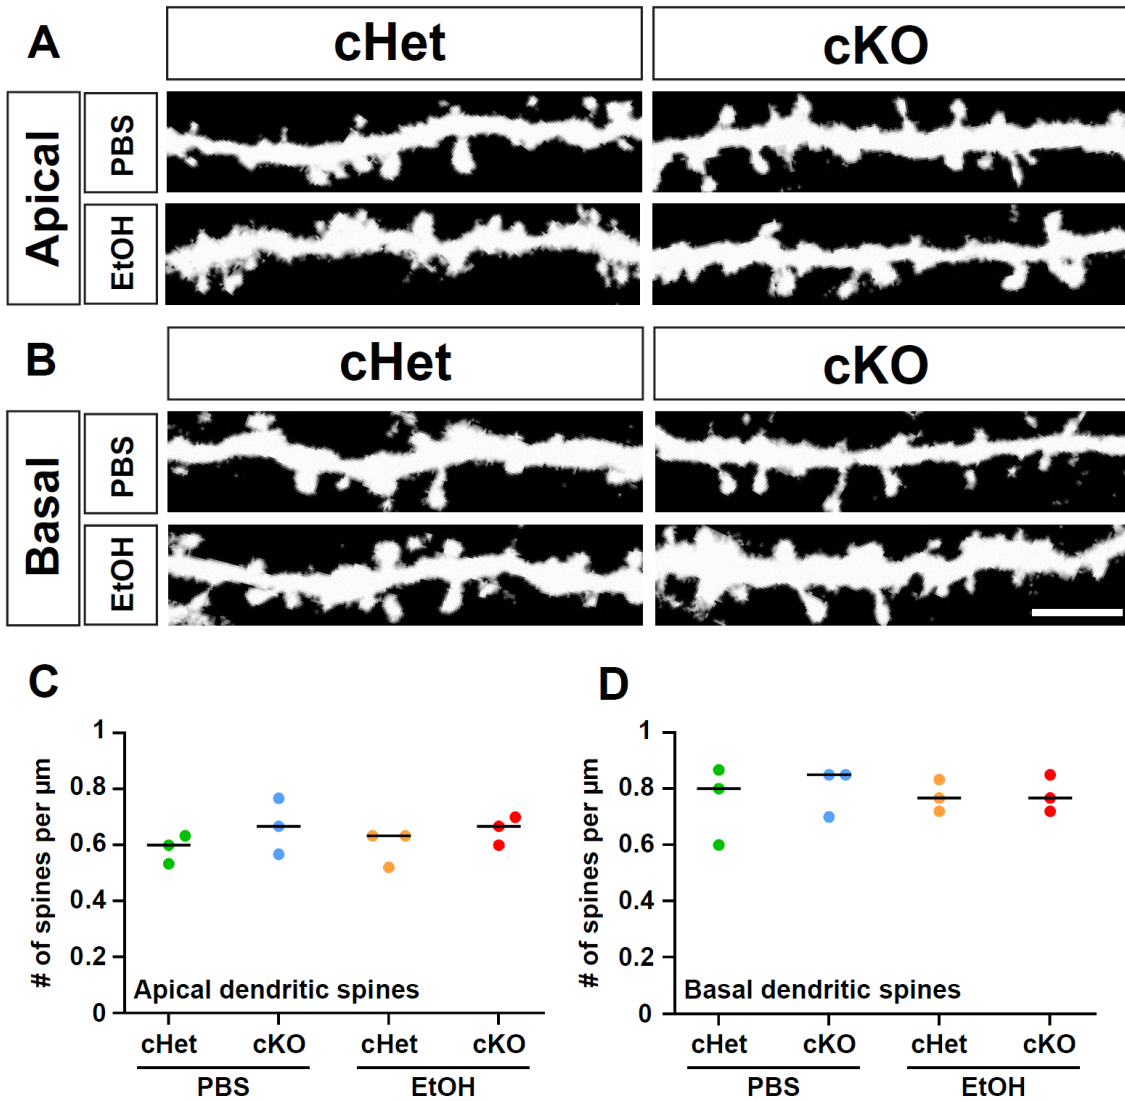

**Fig. S3. No significant abnormalities in the dendritic spines of Thy1-YFP-positive cortical neurons by EtOH exposure and/or loss of cilia**

(A, B) Representative images of spines on apical (A) and basal (B) dendrites of Thy1-YFP-positive layer V neurons in M1 for the indicated conditions at P21. Bar = 5  $\mu\text{m}$ . (C, D) Quantification of spines on apical and basal dendrites of Thy1-YFP-positive neurons. The line indicates the mean.

Figure S4

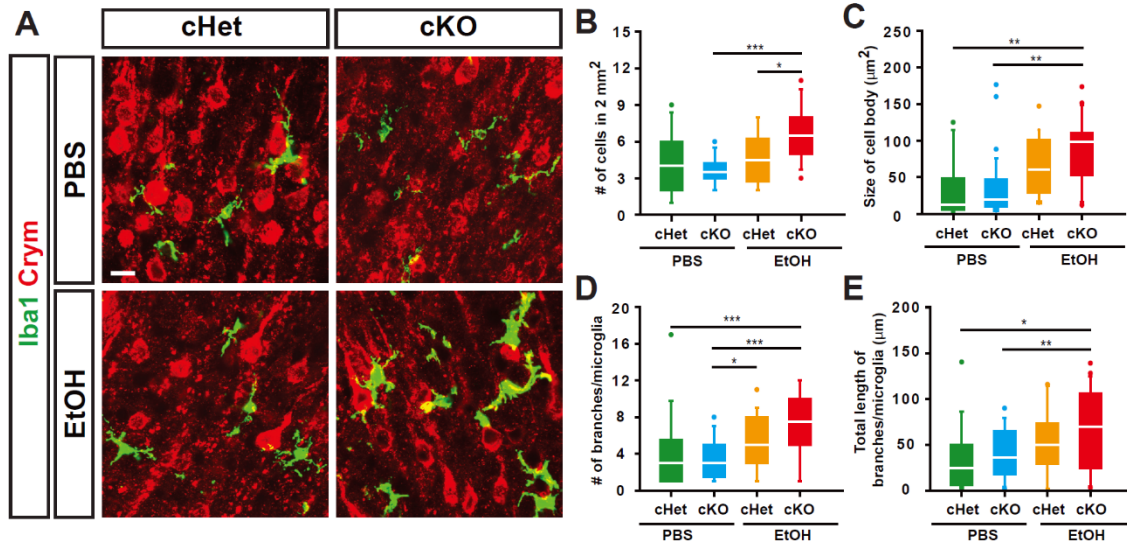

**Fig. S4. Morphology of microglia in the cortex of cKO mice exposed to EtOH**

(A) Iba1-positive microglia (green) are detected adjacent to Crym-positive layer V pyramidal neurons (red) for the indicated conditions 24 hours after exposure. Microglia with a large, amoeboid shape are observed in EtOH-exposed cKO mice. Bar = 10 µm. (B-E) Measurements of cell number (B), soma size (C), number of branches per cell (D), and total length of branches (E) per cell indicate significant increase in the size and morphological complexity of microglia in cKO mice exposed to EtOH. \* $P < 0.05$ , \*\* $P < 0.01$ , \*\*\* $P < 0.001$  by post hoc Tukey or simple main effect test following two-way ANOVA.

**Table S1.** F and P values of two-way ANOVA analyses

| Fig. #                 | Exposure/Treatment |         | Genotype          |         | Interaction      |         |
|------------------------|--------------------|---------|-------------------|---------|------------------|---------|
|                        | F                  | P       | F                 | P       | F                | P       |
| <b>1E</b>              | F (1,12) = 2.917   | 0.1133  | F (1,12) = 0.0229 | 0.8822  | F (1,12) = 0.102 | 0.7552  |
| <b>1F</b>              | F (1,12) = 50.89   | <0.0001 | F (1,12) = 44.88  | <0.0001 | F (1,12) = 43.99 | <0.0001 |
| <b>1H</b>              | F (1,12) = 6.981   | 0.0215  | F (1,12) = 3.875  | 0.0725  | F (1,12) = 3.904 | 0.0716  |
| <b>1I</b>              | F (1,12) = 19.92   | 0.0008  | F (1,12) = 14.98  | 0.0022  | F (1,12) = 14.84 | 0.0023  |
| <b>2B</b>              | F (1,36) = 0.510   | 0.4800  | F (1,36) = 3.907  | 0.0558  | F (1,36) = 0.871 | 0.3568  |
| <b>2D (Total)</b>      | F (1,56) = 5.215   | 0.0262  | F (1,56) = 13.25  | 0.0006  | F (1,56) = 2.540 | 0.1166  |
| <b>2D (Apical)</b>     | F (1,56) = 3.826   | 0.0555  | F (1,56) = 9.289  | 0.0035  | F (1,56) = 3.826 | 0.0555  |
| <b>2D (Basal)</b>      | F (1,56) = 4.152   | 0.0463  | F (1,56) = 10.93  | 0.0017  | F (1,56) = 0.851 | 0.3601  |
| <b>2E (1st Apical)</b> | F (1,56) = 1.333   | 0.2531  | F (1,56) = 0.333  | 0.5660  | F (1,56) = 0.333 | 0.5660  |
| <b>2E (2nd Apical)</b> | F (1,56) = 1.510   | 0.2243  | F (1,56) = 1.510  | 0.2243  | F (1,56) = 2.109 | 0.1520  |
| <b>2E (3rd Apical)</b> | F (1,56) = 4.206   | 0.0450  | F (1,56) = 12.22  | 0.0009  | F (1,56) = 4.206 | 0.0450  |
| <b>2E (1st Basal)</b>  | F (1,56) = 4.029   | 0.0496  | F (1,56) = 5.401  | 0.0238  | F (1,56) = 0.011 | 0.9162  |
| <b>2E (2nd Basal)</b>  | F (1,56) = 3.659   | 0.0609  | F (1,56) = 10.61  | 0.0019  | F (1,56) = 0.965 | 0.3302  |
| <b>2E (3rd Basal)</b>  | F (1,56) = 2.164   | 0.1469  | F (1,56) = 9.513  | 0.0032  | F (1,56) = 2.164 | 0.1469  |
| <b>2F (1st Apical)</b> | F (1,44) = 0.028   | 0.8677  | F (1,44) = 0.5307 | 0.4702  | F (1,44) = 0.134 | 0.7165  |
| <b>2F (2nd Apical)</b> | F (1,44) = 0.011   | 0.9153  | F (1,44) = 6.779  | 0.0125  | F (1,44) = 0.010 | 0.9226  |
| <b>2F (3rd Apical)</b> | F (1,44) = 3.604   | 0.0642  | F (1,44) = 10.17  | 0.0026  | F (1,44) = 4.971 | 0.0309  |
| <b>2F (1st Basal)</b>  | F (1,44) = 0.343   | 0.561   | F (1,44) = 0.283  | 0.5974  | F (1,44) = 0.002 | 0.9618  |
| <b>2F (2nd Basal)</b>  | F (1,44) = 0.481   | 0.4916  | F (1,44) = 3.904  | 0.0545  | F (1,44) = 0.555 | 0.4602  |
| <b>2F (3rd Basal)</b>  | F (1,44) = 0.622   | 0.4345  | F (1,44) = 4.285  | 0.0444  | F (1,44) = 0.346 | 0.5597  |
| <b>2H</b>              | F (1,12) = 12.55   | 0.0040  | F (1,12) = 9.350  | 0.0099  | F (1,12) = 10.04 | 0.0081  |
| <b>2I</b>              | F (1,12) = 121.3   | <0.0001 | F (1,12) = 78.44  | <0.0001 | F (1,12) = 78.78 | <0.0001 |
| <b>2J</b>              | F (1,12) = 15.37   | 0.0020  | F (1,12) = 4.373  | 0.0584  | F (1,12) = 4.315 | 0.0599  |

|                        |                  |         |                  |         |                  |        |
|------------------------|------------------|---------|------------------|---------|------------------|--------|
| <b>2K</b>              | F (1,12) = 23.90 | 0.0004  | F (1,12) = 4.109 | 0.0655  | F (1,12) = 4.285 | 0.0607 |
| <b>3E</b>              | F (1,12) = 9.566 | 0.0093  | F (1,12) = 1.585 | 0.2319  | F (1,12) = 2.071 | 0.1757 |
| <b>4C</b>              | F (1,12) = 44.26 | <0.0001 | F (1,12) = 32.89 | <0.0001 | F (1,12) = 27.84 | 0.0002 |
| <b>4F</b>              | F (1,12) = 12.66 | 0.0039  | F (1,12) = 10.64 | 0.0068  | F (1,12) = 9.996 | 0.0082 |
| <b>4G</b>              | F (1,12) = 14.21 | 0.0027  | F (1,12) = 15.50 | 0.0020  | F (1,12) = 14.15 | 0.0027 |
| <b>4I</b>              | F (1,36) = 0.100 | 0.7541  | F (1,36) = 0.015 | 0.9040  | F (1,36) = 0.642 | 0.4282 |
| <b>4J (Total)</b>      | F (1,56) = 1.221 | 0.2739  | F (1,56) = 4.387 | 0.0407  | F (1,56) = 6.039 | 0.0171 |
| <b>4J (Apical)</b>     | F (1,56) = 0.020 | 0.8888  | F (1,56) = 3.332 | 0.0733  | F (1,56) = 1.080 | 0.3032 |
| <b>4J (Basal)</b>      | F (1,56) = 2.454 | 0.1228  | F (1,56) = 2.454 | 0.1228  | F (1,56) = 8.009 | 0.0064 |
| <b>4K (1st Apical)</b> | F (1,56) = 0.123 | 0.7273  | F (1,56) = 0.123 | 0.7273  | F (1,56) = 0.123 | 0.7273 |
| <b>4K (2nd Apical)</b> | F (1,56) = 0.073 | 0.7879  | F (1,56) = 1.827 | 0.1819  | F (1,56) = 1.372 | 0.2464 |
| <b>4K (3rd Apical)</b> | F (1,56) = 0.090 | 0.7655  | F (1,56) = 2.884 | 0.0950  | F (1,56) = 0.693 | 0.4087 |
| <b>4K (1st Basal)</b>  | F (1,56) = 0.128 | 0.7217  | F (1,56) = 2.406 | 0.1265  | F (1,56) = 4.612 | 0.0361 |
| <b>4K (2nd Basal)</b>  | F (1,56) = 2.704 | 0.1057  | F (1,56) = 0.920 | 0.3415  | F (1,56) = 4.808 | 0.0325 |
| <b>4K (3rd Basal)</b>  | F (1,56) = 4.334 | 0.0419  | F (1,56) = 2.048 | 0.1579  | F (1,56) = 8.193 | 0.0059 |
| <b>4L (1st Apical)</b> | F (1,56) = 0.051 | 0.8217  | F (1,56) = 0.390 | 0.5348  | F (1,56) = 0.272 | 0.6043 |
| <b>4L (2nd Apical)</b> | F (1,56) = 0.338 | 0.5635  | F (1,56) = 1.895 | 0.1742  | F (1,56) = 0.459 | 0.5010 |
| <b>4L (3rd Apical)</b> | F (1,56) = 0.094 | 0.7597  | F (1,56) = 3.102 | 0.0836  | F (1,56) = 1.578 | 0.2143 |
| <b>4L (1st Basal)</b>  | F (1,56) = 0.092 | 0.7633  | F (1,56) = 1.314 | 0.2565  | F (1,56) = 3.833 | 0.0552 |
| <b>4L (2nd Basal)</b>  | F (1,56) = 3.898 | 0.0533  | F (1,56) = 0.680 | 0.4131  | F (1,56) = 0.942 | 0.3360 |
| <b>4L (3rd Basal)</b>  | F (1,56) = 2.176 | 0.1458  | F (1,56) = 0.300 | 0.5859  | F (1,56) = 4.922 | 0.0306 |
| <b>S4B</b>             | F (1,55) = 9.860 | 0.0027  | F (1,55) = 2.154 | 0.1479  | F (1,55) = 4.977 | 0.0298 |
| <b>S4C</b>             | F (1,94) = 26.43 | <0.0001 | F (1,94) = 2.031 | 0.1574  | F (1,94) = 1.354 | 0.2475 |
| <b>S4D</b>             | F (1,85) = 11.31 | 0.0012  | F (1,85) = 0.574 | 0.4506  | F (1,85) = 2.486 | 0.1186 |
| <b>S4E</b>             | F (1,84) = 8.308 | 0.0050  | F (1,84) = 1.750 | 0.1894  | F (1,84) = 0.430 | 0.5140 |

**Supplementary Table 1**
